# Supplementary material for: The impact of premorbid and current intellect in schizophrenia: cognitive, symptom, and functional outcomes
Source: PubMed Central journal article supplement (PMC4849463; doi:10.1038/npjschz.2015.43), 2015-11-04
Supplement: npjschz201543-s1.pdf [file npjschz201543-s1.pdf]

1 **Supplemental Material**

2 **The Relationship between Pre-morbid and Current Intellect Estimates in Schizophrenia:**

3 **Cognitive, Symptom and Functional Status**

4 Running Title: Pre-morbid and Current Intellect in Schizophrenia

5 Ruth Wells<sup>a,b</sup>, Vaidy Swaminathan<sup>c, d, e, f</sup>, Suresh Sundram<sup>c, d, f, g</sup>, Danielle Weinberg<sup>a,b</sup>, Jason

6 Bruggemann<sup>a, b</sup>, Isabella Jacomb<sup>b</sup>, Vanessa Cropley<sup>c</sup>, Rhoshel Lenroot<sup>a, b, e</sup>, Avril M. Pereira<sup>c, f</sup>,

7 Andrew Zalesky<sup>c</sup>, Chad Bousman<sup>c</sup>, Christos Pantelis<sup>c, e</sup>, Cynthia Shannon Weickert<sup>a, b, e</sup>,

8 Thomas W. Weickert<sup>a, b, d, \*</sup>

9 <sup>a</sup> School of Psychiatry, University of New South Wales, Sydney, NSW, Australia

10 <sup>b</sup> Neuroscience Research Australia, Randwick, Sydney, NSW, Australia

11 <sup>c</sup> Department of Psychiatry, University of Melbourne, Parkville, Victoria, Australia

12 <sup>d</sup> Northern Psychiatry Research Centre, North Western Mental Health, Melbourne Health, Victoria,  
13 Australia

14 <sup>e</sup> Schizophrenia Research Institute, Sydney, NSW, Australia

15 <sup>f</sup> Molecular Psychopharmacology Laboratory, The Florey Institute of Neuroscience and Mental  
16 Health, Parkville, Victoria, Australia

17 <sup>g</sup> Current address: Department of Psychiatry, School of Clinical Sciences, Monash University, Clayton,  
18 Victoria, Australia

19 \* Corresponding Author

20 Corresponding Author Address:

21 Thomas Weickert, PhD

22 Neuroscience Research Australia

23 Barker Street

24 Randwick, NSW 2031

25 Office: +61 02 9399 1730

26 Fax: +61 02 9399 1034

27 email: t.weickert@unsw.edu.au

28 Wells et al. 2015 Supplemental Material

29 **Supplemental Material**

30 Methods

31 Clinically Derived Groups Method

32 To determine whether the resulting empirical groups were in agreement with clinically meaningful  
33 criteria, patients were also categorized into three groups based on their decline from pre-morbid IQ  
34 estimate (WTAR). A composite current global cognitive ability estimate was created by averaging the  
35 WAIS-III LNS and RBANS Attention and Immediate Memory z-scores, with z-scores below negative 1  
36 indicating performance more than one standard deviation below control means, and therefore  
37 below the normal range. As per Weickert and colleagues<sup>6</sup> patients were allocated to: (1) the  
38 *preserved group*, WTAR scores  $\geq 90$ , and current global cognitive ability z-score  $> -1$  ; (2) the  
39 *deteriorated group*, WTAR scores  $\geq 90$  and current global cognitive ability z-score  $< -1$  ; or (3) the  
40 *compromised group*, WTAR score  $< 90$  and current global cognitive ability z-score  $< -1$ .

41

42 **Supplemental Table S1. Frequency of antipsychotics prescribed in the previous month to patients**  
 43 **with schizophrenia in each of the empirically derived subgroups.**

| <b>Medication</b>                                                                         | <b>CIQ</b> | <b>DIQ</b> | <b>PIQ</b> | <b>Total</b> |
|-------------------------------------------------------------------------------------------|------------|------------|------------|--------------|
| No antipsychotics                                                                         | 8          | 28         | 28         | 64           |
| amisulpride                                                                               | 7          | 10         | 14         | 31           |
| amisulpride & aripiprazole                                                                | 2          | 1          | 2          | 5            |
| amisulpride & aripiprazole & olanzapine & pericyazine & quetiapine fumerate & risperidone | 0          | 1          | 0          | 1            |
| amisulpride & chlorpromazine hydrochloride                                                | 0          | 1          | 0          | 1            |
| amisulpride & chlorpromazine hydrochloride & clozapine                                    | 0          | 1          | 0          | 1            |
| amisulpride & clozapine                                                                   | 3          | 7          | 3          | 13           |
| amisulpride & clozapine & olanzapine                                                      | 0          | 0          | 1          | 1            |
| amisulpride & clozapine & quetiapine fumerate                                             | 0          | 1          | 0          | 1            |
| amisulpride & flupenthixol decanoate                                                      | 0          | 1          | 1          | 2            |
| amisulpride & olanzapine                                                                  | 2          | 1          | 0          | 3            |
| amisulpride & quetiapine fumerate                                                         | 1          | 3          | 0          | 4            |
| amisulpride & quetiapine fumerate & trifluoperazine hydrochloride                         | 0          | 0          | 1          | 1            |
| amisulpride & risperidone                                                                 | 1          | 0          | 0          | 1            |
| amisulpride & risperidone consta                                                          | 0          | 2          | 0          | 2            |
| amisulpride & trifluoperazine hydrochloride                                               | 1          | 0          | 0          | 1            |
| amisulpride & ziprasidone hydrochloride                                                   | 0          | 1          | 1          | 2            |
| aripiprazole                                                                              | 6          | 15         | 9          | 30           |
| aripiprazole & clozapine                                                                  | 2          | 1          | 1          | 4            |
| aripiprazole & olanzapine                                                                 | 1          | 3          | 1          | 5            |
| aripiprazole & quetiapine fumerate                                                        | 1          | 2          | 2          | 5            |
| aripiprazole & risperidone consta                                                         | 1          | 0          | 0          | 1            |
| chlorpromazine hydrochloride                                                              | 1          | 0          | 0          | 1            |
| chlorpromazine hydrochloride & flupenthixol decanoate                                     | 1          | 0          | 0          | 1            |
| chlorpromazine hydrochloride & olanzapine                                                 | 0          | 0          | 1          | 1            |
| chlorpromazine hydrochloride & risperidone & risperidone consta                           | 1          | 0          | 0          | 1            |
| chlorpromazine hydrochloride & thiothixene & olanzapine                                   | 0          | 0          | 1          | 1            |

|                                                                              |    |    |    |    |
|------------------------------------------------------------------------------|----|----|----|----|
| clozapine                                                                    | 35 | 31 | 8  | 74 |
| clozapine & amisulpride                                                      | 0  | 1  | 0  | 1  |
| clozapine & flupenthixol decanoate                                           | 0  | 0  | 1  | 1  |
| clozapine & olanzapine                                                       | 1  | 0  | 0  | 1  |
| clozapine & quetiapine fumerate                                              | 0  | 2  | 0  | 2  |
| clozapine & risperidone                                                      | 1  | 2  | 0  | 3  |
| clozapine & risperidone consta                                               | 0  | 2  | 1  | 3  |
| clozapine & ziprasidone hydrochloride                                        | 1  | 1  | 0  | 2  |
| clozapine & zuclopenthixol decanoate                                         | 1  | 1  | 0  | 2  |
| flupenthixol decanoate                                                       | 4  | 2  | 4  | 10 |
| flupenthixol decanoate & olanzapine                                          | 2  | 1  | 0  | 3  |
| flupenthixol decanoate & quetiapine fumerate                                 | 1  | 0  | 0  | 1  |
| fluphenazine decanoate                                                       | 1  | 1  | 0  | 2  |
| fluphenazine decanoate & olanzapine                                          | 0  | 1  | 1  | 2  |
| fluphenazine decanoate & quetiapine fumerate                                 | 0  | 1  | 0  | 1  |
| fluphenazine decanoate & quetiapine fumerate & trifluoperazine hydrochloride | 0  | 1  | 0  | 1  |
| fluphenazine decanoate & thioridazine hydrochloride & olanzapine             | 0  | 0  | 1  | 1  |
| haloperidol                                                                  | 0  | 3  | 2  | 5  |
| haloperidol & olanzapine & ziprasidone hydrochloride                         | 1  | 0  | 0  | 1  |
| haloperidol & quetiapine fumerate                                            | 0  | 1  | 0  | 1  |
| haloperidol decanoate                                                        | 0  | 2  | 0  | 2  |
| olanzapine                                                                   | 15 | 36 | 23 | 74 |
| olanzapine & flupenthixol decanoate                                          | 1  | 0  | 0  | 1  |
| olanzapine & quetiapine fumerate                                             | 2  | 3  | 0  | 5  |
| olanzapine & quetiapine fumerate & risperidone                               | 0  | 1  | 0  | 1  |
| olanzapine & quetiapine fumerate & risperidone & thioridazine hydrochloride  | 0  | 1  | 0  | 1  |
| olanzapine & risperidone                                                     | 1  | 0  | 3  | 4  |
| olanzapine & risperidone consta                                              | 1  | 3  | 0  | 4  |
| olanzapine & ziprasidone hydrochloride                                       | 1  | 0  | 0  | 1  |
| olanzapine & zuclopenthixol decanoate                                        | 2  | 1  | 1  | 4  |
| pericyazine                                                                  | 0  | 2  | 0  | 2  |
| quetiapine fumerate                                                          | 7  | 16 | 14 | 37 |

|                                                                         |            |            |            |            |
|-------------------------------------------------------------------------|------------|------------|------------|------------|
| quetiapine fumerate & risperidone                                       | 2          | 1          | 1          | 4          |
| quetiapine fumerate & risperidone consta                                | 1          | 0          | 1          | 2          |
| quetiapine fumerate & trifluoperazine hydrochloride                     | 0          | 1          | 2          | 3          |
| quetiapine fumerate & ziprasidone hydrochloride                         | 0          | 1          | 0          | 1          |
| quetiapine fumerate & zuclopenthixol acetate                            | 0          | 1          | 0          | 1          |
| quetiapine fumerate & zuclopenthixol decanoate                          | 1          | 0          | 0          | 1          |
| risperidone                                                             | 8          | 20         | 13         | 41         |
| risperidone & risperidone consta                                        | 0          | 2          | 1          | 3          |
| risperidone & trifluoperazine hydrochloride & ziprasidone hydrochloride | 0          | 0          | 1          | 1          |
| risperidone consta                                                      | 5          | 5          | 7          | 17         |
| trifluoperazine hydrochloride                                           | 0          | 3          | 3          | 6          |
| ziprasidone hydrochloride                                               | 1          | 6          | 1          | 8          |
| ziprasidone hydrochloride & zuclopenthixol decanoate                    | 0          | 1          | 0          | 1          |
| zuclopenthixol decanoate                                                | 3          | 3          | 1          | 7          |
| zuclopenthixol dihydrochloride                                          | 0          | 0          | 1          | 1          |
| <b>Total</b>                                                            | <b>138</b> | <b>239</b> | <b>157</b> | <b>534</b> |

44

45 Number of patients in each group on each antipsychotic medication, or combination of antipsychotic  
46 medications.

47

48 **Supplemental Table S2. Demographic Characteristics of Clinically Derived Groups**

49

|                   | CIQ<br>(n=147) | DIQ<br>(n=227) | PIQ<br>(n=160) | HC<br>(n=635) | <i>F/χ<sup>2</sup></i> | <i>p</i> | CIQ < DIQ<br>( <i>p</i> ) | CIQ < PIQ<br>( <i>p</i> ) | DIQ < PIQ<br>( <i>p</i> ) | CIQ < HC<br>( <i>p</i> ) | DIQ < HC<br>( <i>p</i> ) | PIQ < HC<br>( <i>p</i> ) |
|-------------------|----------------|----------------|----------------|---------------|------------------------|----------|---------------------------|---------------------------|---------------------------|--------------------------|--------------------------|--------------------------|
| Age (years)       | 39.6 (10.0)    | 37.8 (10.0)    | 40.8 (11.3)    | 41.9 (13.5)   | 6.91                   | <0.001   | <0.163                    | 0.379                     | 0.016                     | 0.036                    | <0.001                   | 0.298                    |
| Education (years) | 11.0 (2.5)     | 13.1 (2.5)     | 14.3 (2.7)     | 15.1 (3.1)    | 97.67                  | <0.001   | <0.001                    | <0.001                    | <0.001                    | <0.001                   | <0.001                   | 0.001                    |
| Age of Onset      | 23.8 (7.0)     | 22.4 (6.0)     | 24.1 (6.7)     |               | 3.71                   | 0.025    | 0.047                     | 0.676                     | 0.013                     |                          |                          |                          |
| Illness Duration  | 15.8 (9.6)     | 15.4 (9.6)     | 16.7 (10.5)    |               | 0.88                   | 0.416    | 0.680                     | 0.419                     | 0.188                     |                          |                          |                          |
| Gender (M/F)      | 70.7%/29.3%    | 67.0%/33.0%    | 61.9%/38.1%    | 44.7%/55.3%   | 57.87                  | <0.001   | 0.411                     | 0.101                     | 0.302                     | <0.001                   | <0.001                   | <0.001                   |

50

51 Notes: Means provided with standard deviation in parentheses with the exception of gender where percentages are provided. CIQ: Compromised group;  
 52 DIQ: Deteriorated group; PIQ: Preserved group; HC: Healthy control group.

53 Supplemental Table S3. Clinically Derived Group Performance on Cognitive Tests

54

| Cognitive Test                        | CIQ        | DIQ        | PIQ        | HC         | Group               |          | CIQ                  | CIQ                  | DIQ                  | CIQ                 | DIQ                 | PIQ                    |
|---------------------------------------|------------|------------|------------|------------|---------------------|----------|----------------------|----------------------|----------------------|---------------------|---------------------|------------------------|
|                                       | (n=147)    | (n=227)    | (n=160)    | (n=635)    | <i>F</i> / $\chi^2$ | <i>p</i> | <<br>DIQ<br><i>d</i> | <<br>PIQ<br><i>d</i> | <<br>PIQ<br><i>d</i> | <<br>HC<br><i>d</i> | <<br>HC<br><i>d</i> | <<br>HC<br><i>d</i>    |
| Visuospatial<br>Constructional        | -1.2 (0.9) | -0.7 (1.0) | -0.2 (1.0) | 0.0 (1.0)  | 252.35              | <0.001   | 0.4                  | <b>0.8</b>           | 0.4                  | <b>1</b>            | 0.6                 | 0.2 <sup>a</sup>       |
| Language <sup>b</sup>                 | -1.4 (0.9) | -1.2 (0.9) | -0.6 (0.9) | -.15 (1.0) | 300.64              | <0.001   | 0.2 <sup>a</sup>     | 0.6                  | 0.4                  | <b>1.3</b>          | <b>1.1</b>          | <b>0.8<sup>a</sup></b> |
| Delayed Verbal<br>Memory <sup>b</sup> | -1.8 (1.5) | -1.5 (1.4) | -0.4 (1.1) | .02 (1.0)  | 474.05              | <0.001   | 0.2                  | <b>1.1</b>           | <b>0.8</b>           | <b>1.6</b>          | <b>1.4</b>          | 0.7                    |
| Verbal Fluency                        | -1.2 (0.8) | -0.8 (0.8) | -0.3 (0.8) | 0 (0.86)   | 108.63              | <0.001   | 0.3                  | <b>0.9</b>           | 0.5                  | <b>1.2</b>          | <b>0.8</b>          | 0.3                    |

59

60

61 Notes: Means with standard deviation in parentheses provided. All tests significant after Bonferroni correction  $p < 0.002$  to  $p = .05$  unless indicated. <sup>a</sup>  
 62 Indicates pairwise comparison is not significant. *d* indicates Cohen's *d* effect size (large effects  $> 0.8$  in bold. CIQ = Compromised group; DIQ = Deteriorated  
 63 group; PIQ = Preserved group; HC = Healthy control group. Visuospatial / Constructional = The Repeatable Battery for the Assessment of Neuropsychological  
 64 Status (RBANS) visuospatial/ constructional Index; Language = RBANS language index; Delayed verbal memory = RBANS delayed memory subtest. Verbal  
 65 Fluency = Controlled Oral Word Association Test. <sup>b</sup> Indicates medians and Kruskal-Wallis Test performed due to non-normal distributions.

66

67

68 Supplemental Figure S1. Scatter Plots of Current Cognitive Function Variables and WTAR displaying Individuals in each Group

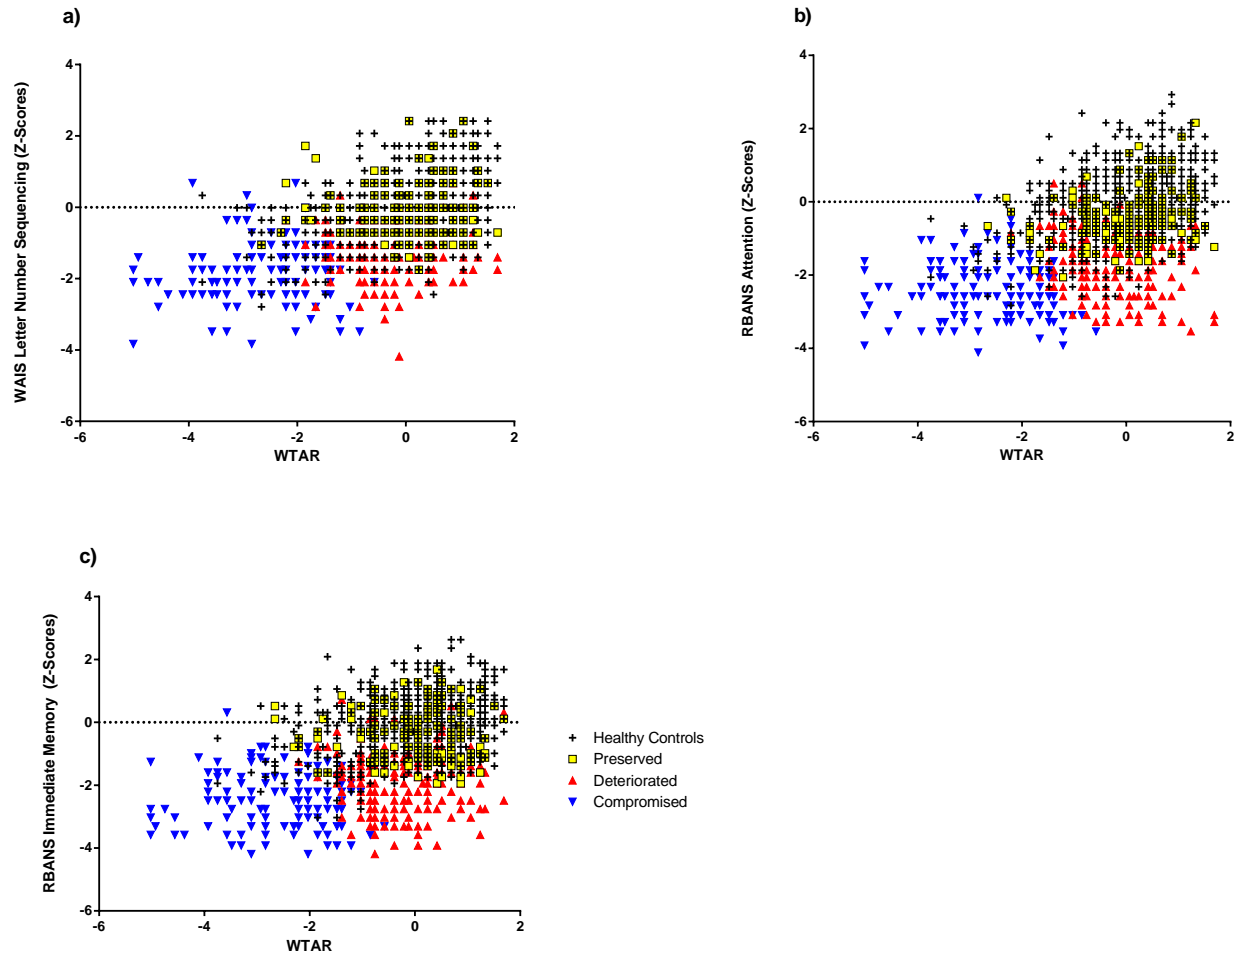

69



70 Scatter plots display data points for each individual comparing current cognitive function variables to an estimate of pre-morbid IQ (WTAR). Individuals from  
71 each group of the empirical clustering procedure can be observed to cluster together. The compromised group showing low current and low pre-morbid  
72 scores; the deteriorated group showing low current and average-high pre-morbid scores; the preserved group showing average-high scores on both current  
73 and pre-morbid measures. WTAR, Wechsler Test of Adult Reading. a) Letter Number Sequencing subtest (WAIS-III) and WTAR. b) Attention: Attention  
74 subtest of RBANS and WTAR. c) Immediate Memory: Immediate memory subtest of RBANS and WTAR.
